# Supplementary material for: Sodium Butyrate Inhibits Neovascularization Partially via TNXIP/VEGFR2 Pathway
Source: Hindawi journal article supplement (doi:10.1155/2020/6415671), 2020-11-20
Supplement: f1 [file 6415671.f1.pdf]

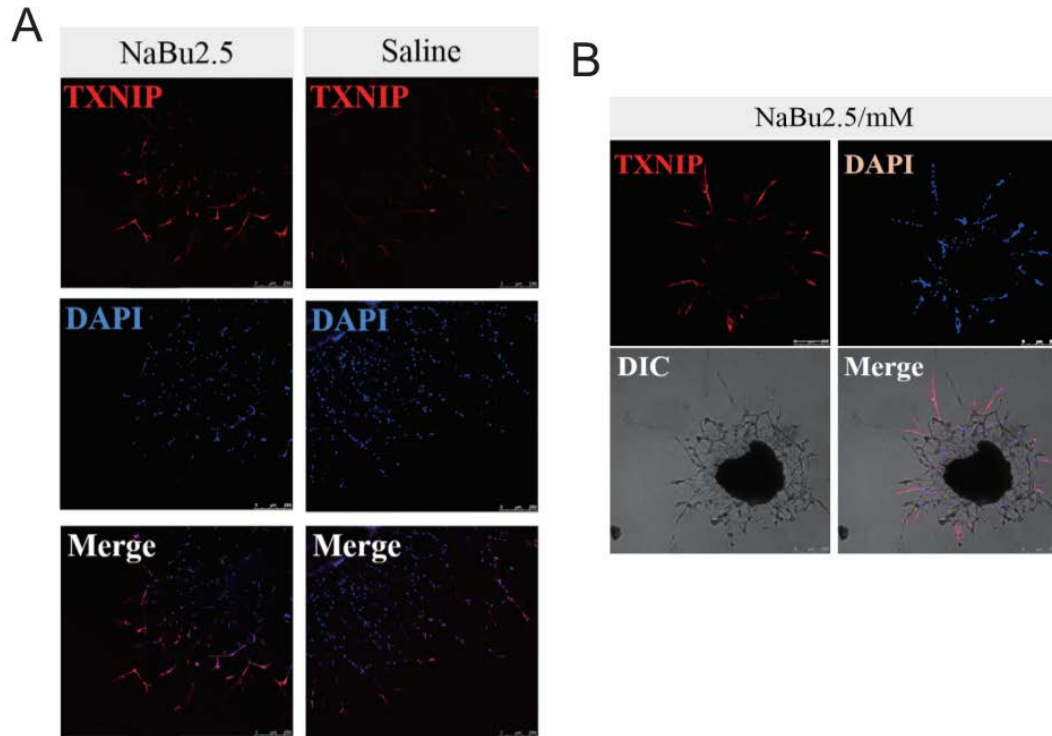

**Supplementary Figure.1 TXNIP expression was higher in NaBu treated group than that of saline treated control group.**

Samples choroid sprouting analysis were used for the ICC staining with TXNIP antibody , and DAPI was used for the staining of nuclei. A, left is NaBu treated group and right is the saline treated group. B, a whole choroid sprouting sample was showed after staining with TXNIP antibody. TXNIP,Red;DAPI,blue.

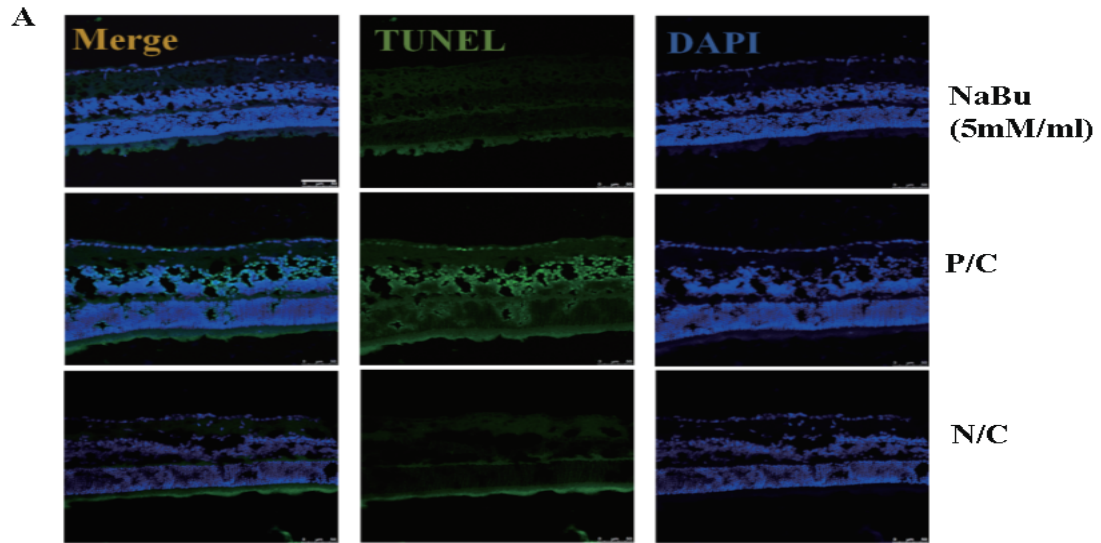

**B**

| <b>Sp</b>   | <b>Av.Ap.Cm</b> | <b>STDEV</b> |
|-------------|-----------------|--------------|
| <b>P/C</b>  | 244             | 12.7279      |
| <b>NaBu</b> | 0.39            | 0.583        |
| <b>N/C</b>  | 0.33            | 0.5774       |

**Supplementary Figure.2 NaBu showed little damage to the normal tissues confirmed by TUNEL analysis.**

A, Represented pictures showed the TUNEL staining in NaBu treated retina, positive control (P/C) and negative control (N/C), TUNEL, green, DAPI (blue) staining the cellular nuclei. B, Statistical analysis for A. Av, Ap, Cm, represent the positive TUNEL staining cell number, STDEV, represent standard deviation.

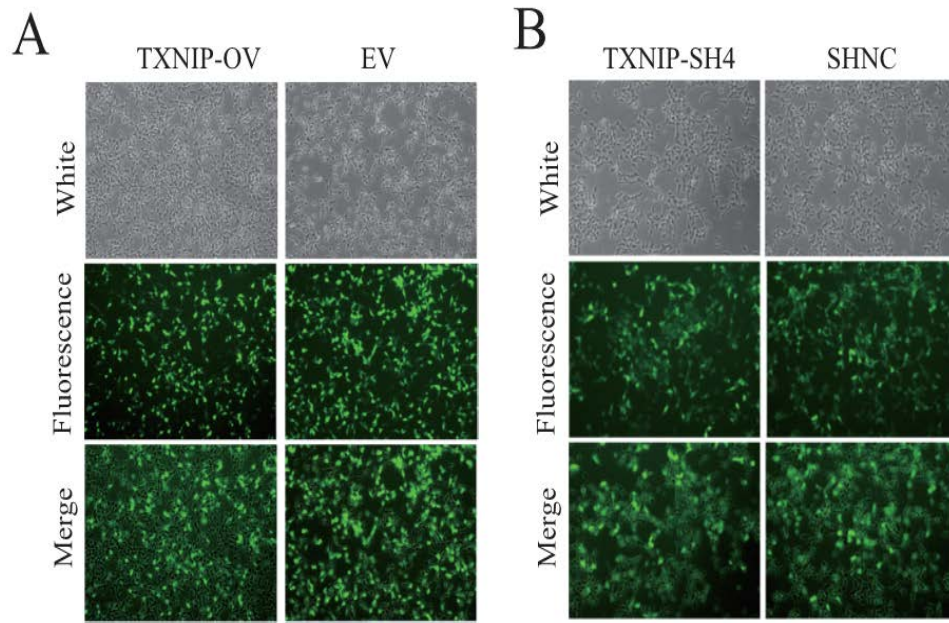

**Supplementary Figure.3 the infection efficiency of TXNIP overexpression with lentivirus plasmids and shRNA expression plasmids(stable cell line).A is TXNIP overexpression,B is shRNA expression plasmids.**
